# Supplementary material for: Composition dependent polymorphism and superconductivity in Y3+x{Rh,Ir}4Ge13−x
Source: Royal Society of Chemistry journal article supplement (doi:10.1039/d2dt00167e), 2022-01-01
Supplement: d2dt00167e1.pdf [file d2dt00167e1.pdf]

# Journal Name

## ARTICLE TYPE

Cite this: DOI: 00.0000/xxxxxxxxxx

## Composition dependent polymorphism and superconductivity in $Y_{3+x}\{\text{Rh,Ir}\}_4\text{Ge}_{13-x}$

Manuel Feig,<sup>a,b,c</sup> Wilder Carrillo-Cabrera,<sup>d</sup> Matej Bobnar,<sup>d</sup> Paul Simon,<sup>d</sup> Caroline Curfs,<sup>e</sup> Volodymyr Levytskyi,<sup>a</sup> Alexander A. Tsirlin,<sup>f</sup> Andreas Leithe-Jasper,<sup>d</sup> and Roman Gumenuk<sup>\*a</sup>

Received Date

Accepted Date

DOI: 00.0000/xxxxxxxxxx

## Supporting Information

<sup>a</sup> Institut für Experimentelle Physik, TU Bergakademie Freiberg, Leipziger Straße 23, 09596 Freiberg, Germany

<sup>b</sup> The Rossendorf Beamline at ESRF, CS 40220, 38043 Grenoble Cedex 9, France

<sup>c</sup> Helmholtz-Zentrum Dresden-Rossendorf (HZDR), Institute of Resource Ecology, P.O. Box 510119, 01314 Dresden, Germany

<sup>d</sup> Max-Planck-Institut für Chemische Physik fester Stoffe, Nöthnitzer Straße 40, 01187 Dresden, Germany

<sup>e</sup> ESRF – The European Synchrotron, CS40220, 38043 Grenoble Cedex, France

<sup>f</sup> Experimental Physics VI, Center for Electronic Correlations and Magnetism, Institute of Physics, University of Augsburg, 86135 Augsburg, Germany

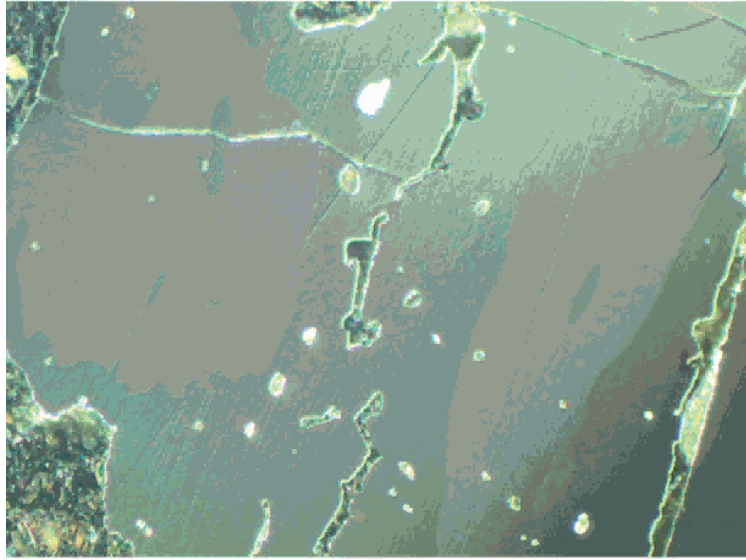

Fig. S1 The surface of the polished  $Y_{3.6}Rh_4Ge_{12.4}$  sample in polarized light.

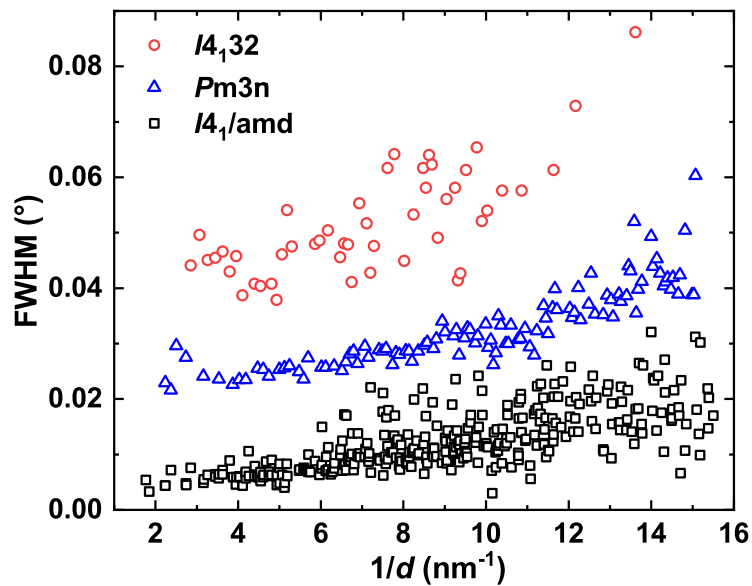

Fig. S2 Comparison of the half-widths for all three structure types within the  $Y_{3+x}Rh_4Ge_{13-x}$  series. The data for the  $I4_132$  and  $Pm\bar{3}n$  types are analyzed in the PXRD pattern of the  $x = 0.4$  sample while  $I4_1/amd$  has been studied in the the  $x = 0$  sample.

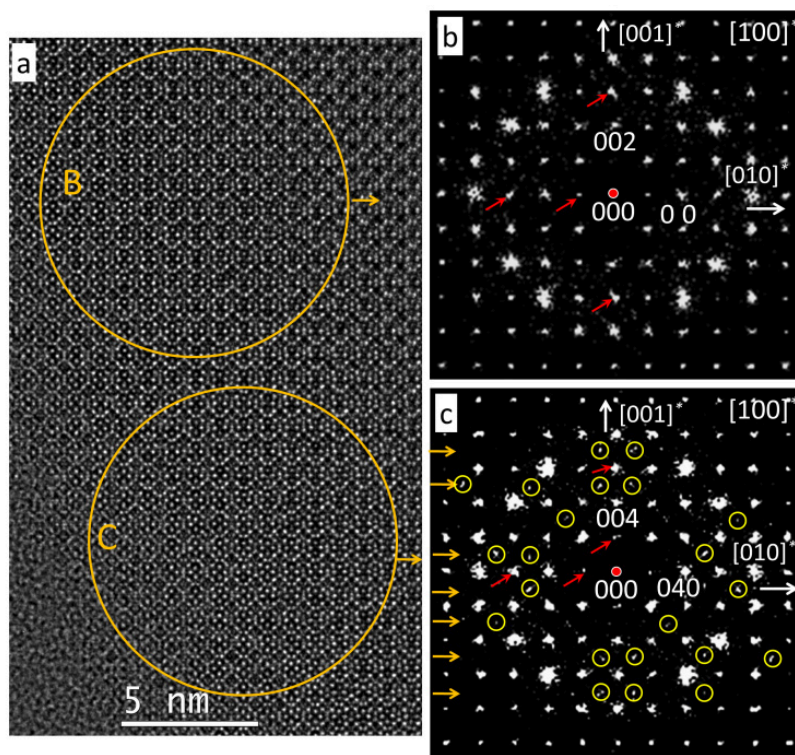

**Fig. S3** (a) HR-TEM image along  $[100]$  direction of  $Y_{3.6}Rh_4Ge_{12.4}$  (SG  $Pm\bar{3}n$ ). Two regions (B and C, diameter of about 15 nm) are marked with circles and their respective FFT patterns are shown in (b) and (c). Image (b) does not show superstructure reflections and is indexed using a primitive cubic structure ( $Pm\bar{3}n$ ). In (c) several such reflections are observed (FFT pattern indexed assuming SG  $I4_132$ ).  $Y_{3.6}Rh_4Ge_{12.4}$  is inhomogeneous at the nano-size level. This sample is thick and several forbidden reflections are observed in the FFT patterns due to dynamical multi beam effects (see red arrows).

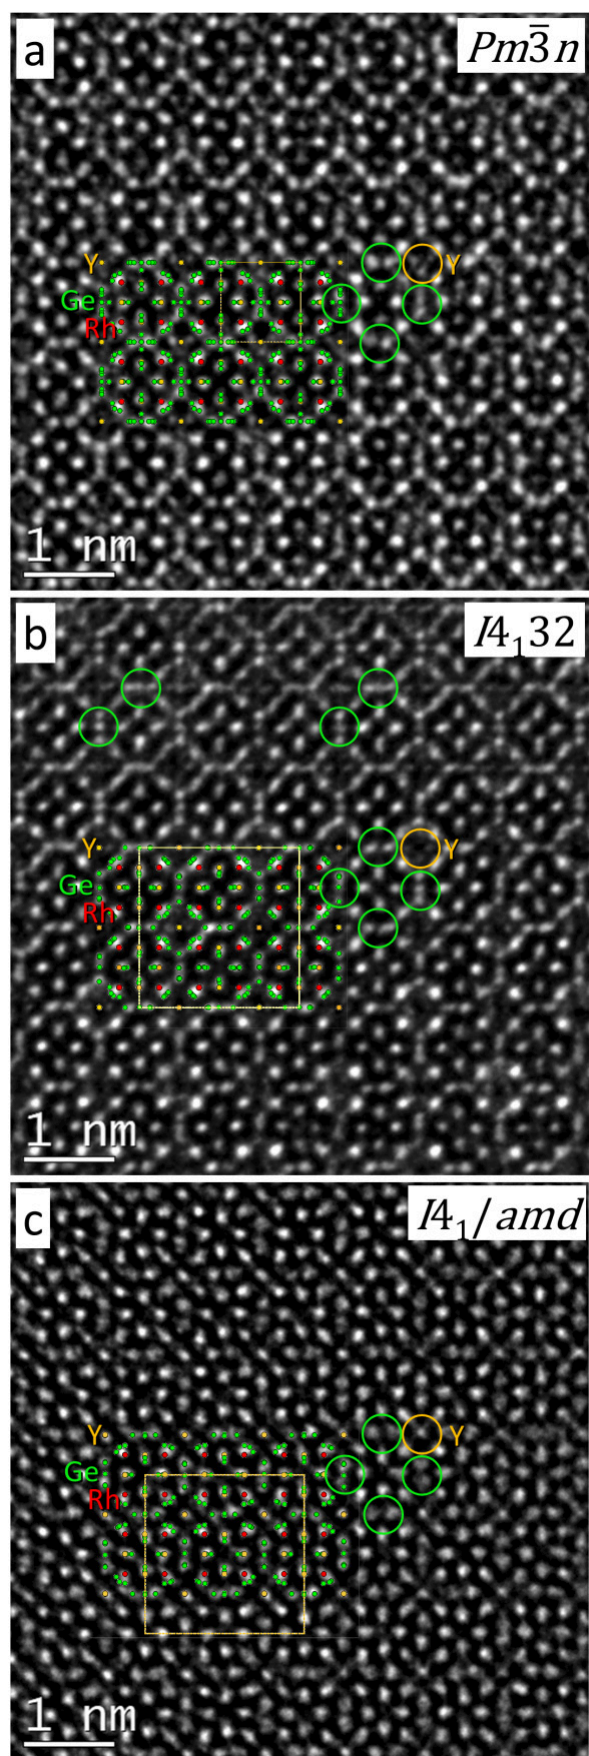

**Fig. S4** HR-TEM image along [100] direction for (a)  $Y_{3.6}Rh_4Ge_{12.4}$  ( $Pm\bar{3}n$  type domain), (b)  $Y_{3.4}Rh_4Ge_{12.6}$  ( $I4_132$  type area) and (c)  $Y_3Rh_4Ge_{13}$  ( $I4_1/amd$  type). Projections of the corresponding structure models are inserted in the images. Three germanium columns (enclosed by green circles) and one Y column (yellow circle) are marked to emphasize the local differences (see also text and Fig. 6, where a more detailed view is provided).

**Table S1** Atomic coordinates, occupational (*G*) and displacement (*B*) parameters for Y<sub>3.6</sub>Rh<sub>4</sub>Ge<sub>12.4</sub>, Y<sub>3.4</sub>Rh<sub>4</sub>Ge<sub>12.6</sub> and Y<sub>3.6</sub>Ir<sub>4</sub>Ge<sub>12.4</sub>.

| atom                                                                                       | site        | <i>G</i> <sup>a</sup> | <i>x/a</i> | <i>y/b</i>       | <i>z/c</i>       | <i>B</i> <sub>iso</sub> /Å <sup>2</sup> |
|--------------------------------------------------------------------------------------------|-------------|-----------------------|------------|------------------|------------------|-----------------------------------------|
| Y <sub>3.6</sub> Rh <sub>4</sub> Ge <sub>12.4</sub> (SG <i>Pm</i> $\bar{3}$ <i>n</i> )     |             |                       |            |                  |                  |                                         |
| Y1                                                                                         | 6 <i>c</i>  |                       | 1/4        | 0                | 1/2              | 0.46(3)                                 |
| Y2                                                                                         | 12 <i>f</i> | 0.08(2)               | 0.099(2)   | 0                | 0                | 0.7(4)                                  |
| Rh                                                                                         | 8 <i>e</i>  |                       | 1/4        | 1/4              | 1/4              | 0.30(2)                                 |
| Ge1                                                                                        | 2 <i>a</i>  | 0.51(5)               | 0          | 0                | 0                | 0.6(1)                                  |
| Ge2                                                                                        | 24 <i>k</i> | 0.59(6)               | 0          | 0.1605(4)        | 0.3366(3)        | 0.77(5)                                 |
| Ge3                                                                                        | 24 <i>k</i> | 0.41(6)               | 0.1323(4)  | 0.2721(5)        | 0                | 0.89(7)                                 |
| Y <sub>3.4</sub> Rh <sub>4</sub> Ge <sub>12.6</sub> (SG <i>I4</i> <sub>1</sub> <i>32</i> ) |             |                       |            |                  |                  |                                         |
| Y1                                                                                         | 24 <i>h</i> |                       | 0.2492(2)  | - <i>x</i> + 1/4 | 1/8              | 0.80(6)                                 |
| Y2                                                                                         | 24 <i>g</i> |                       | 0.7498(2)  | <i>x</i> - 3/4   | 1/8              | 0.66(5)                                 |
| Rh1                                                                                        | 8 <i>b</i>  |                       | 5/8        | 3/8              | 1/8              | 0.7(1)                                  |
| Rh2                                                                                        | 8 <i>a</i>  |                       | 1/8        | 1/8              | 1/8              | 0.64(8)                                 |
| Rh3                                                                                        | 24 <i>g</i> |                       | 0.3743(1)  | 1/8              | <i>x</i> - 1/4   | 0.6(1)                                  |
| Rh4                                                                                        | 24 <i>h</i> |                       | 5/8        | 0.1254(2)        | - <i>y</i> + 1/4 | 0.6(1)                                  |
| Ge1                                                                                        | 16 <i>e</i> | 0.80(1)               | -0.0008(2) | <i>x</i>         | <i>x</i>         | 1.08(3)                                 |
| Ge2                                                                                        | 48 <i>i</i> |                       | 0.5750(1)  | -0.0008(3)       | 0.1556(1)        | 0.98(8)                                 |
| Ge3                                                                                        | 48 <i>i</i> |                       | 0.6303(1)  | 0.0675(2)        | -0.0009(3)       | 1.03(8)                                 |
| Ge4a                                                                                       | 48 <i>i</i> | 0.74(1)               | 0.1601(2)  | 0.0764(2)        | 0.0027(4)        | 0.69(4)                                 |
| Ge4b                                                                                       | 48 <i>i</i> | 0.26(1)               | 0.0002(9)  | 0.1192(5)        | 0.0665(5)        | 0.7(2)                                  |
| <i>T</i>                                                                                   | 48 <i>i</i> | <sup>b</sup>          | 0.5000(3)  | 0.1724(1)        | 0.0844(2)        | 1.15(8)                                 |
| Y <sub>3.6</sub> Ir <sub>4</sub> Ge <sub>12.4</sub> (SG <i>I4</i> <sub>1</sub> <i>32</i> ) |             |                       |            |                  |                  |                                         |
| Y1                                                                                         | 24 <i>h</i> |                       | 0.2501(3)  | - <i>x</i> + 1/4 | 1/8              | 1.06(1)                                 |
| Y2                                                                                         | 24 <i>g</i> |                       | 0.7506(3)  | <i>x</i> - 3/4   | 1/8              | 1.27(1)                                 |
| Ir1                                                                                        | 8 <i>b</i>  |                       | 5/8        | 3/8              | 1/8              | 0.73(1)                                 |
| Ir2                                                                                        | 8 <i>a</i>  |                       | 1/8        | 1/8              | 1/8              | 0.65(1)                                 |
| Ir3                                                                                        | 24 <i>g</i> |                       | 0.3741(2)  | 1/8              | <i>x</i> - 1/4   | 0.97(1)                                 |
| Ir4                                                                                        | 24 <i>h</i> |                       | 5/8        | 0.1252(2)        | - <i>y</i> + 1/4 | 1.05(1)                                 |
| Ge1                                                                                        | 16 <i>e</i> |                       | 0.0018(2)  | <i>x</i>         | <i>x</i>         | 1.98(1)                                 |
| Ge2                                                                                        | 48 <i>i</i> |                       | 0.4995(9)  | 0.1724(2)        | 0.0777(2)        | 1.99(1)                                 |
| Ge3a                                                                                       | 48 <i>i</i> | 0.79(1)               | 0.5770(2)  | 0.0007(9)        | 0.1613(2)        | 0.81(1)                                 |
| Ge3b                                                                                       | 48 <i>i</i> | 0.21(1)               | 0.5595(7)  | 0.000(2)         | 0.1189(6)        | 1.03(1)                                 |
| Ge4a                                                                                       | 48 <i>i</i> | 0.59(1)               | 0.1700(3)  | 0.0773(3)        | 0.0002(9)        | 0.94(1)                                 |
| Ge4b                                                                                       | 48 <i>i</i> | 0.41(1)               | 0.0642(4)  | 0.997(1)         | 0.3683(4)        | 0.81(1)                                 |
| <i>T</i>                                                                                   | 48 <i>i</i> | <sup>c</sup>          | 0.6378(2)  | 0.0656(2)        | -0.0017(9)       | 1.91(3)                                 |

<sup>a</sup> occupancy *G* is given only if it deviates from 1.0<sup>b</sup> *T* = 0.94(2)Ge + 0.06(2)Y<sup>c</sup> *T* = 0.81(1)Ge + 0.19(1)Y

**Table S2** Atomic coordinates, occupational (*G*) and displacement (*B*) parameters for Y<sub>3</sub>Rh<sub>4</sub>Ge<sub>13</sub> and Y<sub>3</sub>Ir<sub>4</sub>Ge<sub>13</sub>.

| atom                                                                                      | site | <i>G</i> | <i>x/a</i> | <i>y/b</i>     | <i>z/c</i> | <i>B</i> <sub>iso</sub> /Å <sup>2</sup> |
|-------------------------------------------------------------------------------------------|------|----------|------------|----------------|------------|-----------------------------------------|
| Y <sub>3</sub> Rh <sub>4</sub> Ge <sub>13</sub> (SG <i>I4</i> <sub>1</sub> / <i>amd</i> ) |      |          |            |                |            |                                         |
| Y1                                                                                        | 16g  |          | 0.2505(4)  | <i>x</i> + 1/4 | 7/8        | 0.47(8)                                 |
| Y2                                                                                        | 16h  |          | 0          | 0.1255(6)      | 0.0013(9)  | 0.55(8)                                 |
| Y3                                                                                        | 16h  |          | 0          | 0.1255(6)      | 0.4993(8)  | 0.47(8)                                 |
| Rh1                                                                                       | 16g  |          | 0.1256(4)  | <i>x</i> + 1/4 | 7/8        | 0.24(16)                                |
| Rh2                                                                                       | 16g  |          | 0.3742(4)  | <i>x</i> + 1/4 | 7/8        | 0.24(16)                                |
| Rh3                                                                                       | 32i  |          | 0.1245(4)  | 0.1254(4)      | 0.1249(2)  | 0.39(16)                                |
| Ge1                                                                                       | 16h  |          | 0          | 0.1252(6)      | 0.6836(6)  | 0.68(4) <sup>a</sup>                    |
| Ge2                                                                                       | 16h  |          | 0          | 0.1724(6)      | 0.1687(6)  | 0.68                                    |
| Ge3                                                                                       | 16h  |          | 0          | 0.0006(7)      | 0.2450(6)  | 1.34(8)                                 |
| Ge4                                                                                       | 16h  |          | 0          | 0.6588(6)      | 0.1741(6)  | 0.68                                    |
| Ge5a                                                                                      | 16h  | 0.68(3)  | 0          | 0.1597(12)     | 0.3237(10) | 0.68                                    |
| Ge5b                                                                                      | 16h  | 0.32     | 0          | 0.123(3)       | 0.315(2)   | 0.68                                    |
| Ge6                                                                                       | 32i  |          | 0.2507(6)  | 0.1697(4)      | 0.1696(3)  | 0.68                                    |
| Ge7                                                                                       | 32i  |          | 0.3278(3)  | 0.0838(3)      | 0.5001(6)  | 0.68                                    |
| Ge8                                                                                       | 32i  |          | 0.0704(4)  | 0.0004(5)      | 0.1067(3)  | 1.34(16)                                |
| Ge9                                                                                       | 32i  |          | 0.1358(3)  | 0.0667(3)      | 0.2500(6)  | 0.95(8)                                 |
| Y <sub>3</sub> Ir <sub>4</sub> Ge <sub>13</sub> (SG <i>I4</i> <sub>1</sub> / <i>amd</i> ) |      |          |            |                |            |                                         |
| Y1                                                                                        | 16g  |          | 0.2501(5)  | <i>x</i> + 1/4 | 7/8        | 0.92(2)                                 |
| Y2                                                                                        | 16h  |          | 0          | 0.1244(8)      | 0.0005(11) | 0.92(2)                                 |
| Y3                                                                                        | 16h  |          | 0          | 0.1267(8)      | 0.4996(11) | 0.92(2)                                 |
| Ir1                                                                                       | 16g  |          | 0.1251(3)  | <i>x</i> + 1/4 | 7/8        | 0.71(2)                                 |
| Ir2                                                                                       | 16g  |          | 0.3745(3)  | <i>x</i> + 1/4 | 7/8        | 0.67(2)                                 |
| Ir3                                                                                       | 32i  |          | 0.1254(3)  | 0.1255(3)      | 0.1249(2)  | 0.57(2)                                 |
| Ge1                                                                                       | 16h  |          | 0          | 0.1249(8)      | 0.6857(7)  | 1.07(2)                                 |
| Ge2                                                                                       | 16h  |          | 0          | 0.1723(7)      | 0.1695(8)  | 1.05(2)                                 |
| Ge3                                                                                       | 16h  |          | 0          | 0.0027(8)      | 0.2455(7)  | 1.29(2)                                 |
| Ge4                                                                                       | 16h  |          | 0          | 0.6599(8)      | 0.1747(8)  | 1.01(2)                                 |
| Ge5                                                                                       | 16h  |          | 0          | 0.1486(8)      | 0.3182(9)  | 1.20(2)                                 |
| Ge6                                                                                       | 32i  |          | 0.2502(8)  | 0.1697(5)      | 0.1691(4)  | 1.03(2)                                 |
| Ge7                                                                                       | 32i  |          | 0.3268(5)  | 0.0838(5)      | 0.5003(8)  | 1.01(2)                                 |
| Ge8                                                                                       | 32i  |          | 0.0683(5)  | 0.0007(8)      | 0.1084(4)  | 1.24(2)                                 |
| Ge9                                                                                       | 32i  |          | 0.1338(5)  | 0.0658(5)      | 0.2498(8)  | 1.25(2)                                 |

<sup>a</sup> *B*<sub>iso</sub> for all Ge-atoms, with the exception of Ge3, Ge8, Ge9, were fixed to the same value.

**Table S3** Bonding distances for all three structure types in the  $Y_{3+x}Rh_4Ge_{13-x}$  system.

| $x = 0.6$ (SG $Pm\bar{3}n$ ) |    |                     |     |    |                     |
|------------------------------|----|---------------------|-----|----|---------------------|
| Y1                           | Ge | 3.038(2) – 3.301(4) | Rh  | Ge | 2.484(2) – 2.503(1) |
|                              | Rh | 3.1682(1)           | Ge  | Ge | 2.370(5) – 3.392(3) |
|                              | Y1 | 4.4805(1)           |     |    |                     |
| $x = 0.4$ (SG $I4_132$ )     |    |                     |     |    |                     |
| Y1                           | Ge | 3.029(5) – 3.46(1)  | Y2  | Ge | 3.088(4) – 3.336(4) |
|                              | Rh | 3.146(3) – 3.177(3) |     | Rh | 3.162(3) – 3.187(4) |
|                              | Y1 | 4.4773(1)           |     | Y2 | 4.4772(1)           |
| Rh1                          | Ge | 2.459(4)            | Rh3 | Ge | 2.458(5) – 2.513(6) |
| Rh2                          | Ge | 2.439(6) – 2.47(2)  | Rh4 | Ge | 2.477(5) – 2.498(5) |
| Ge                           | Ge | 2.464(9) – 3.454(6) |     |    |                     |
| $x = 0$ (SG $I4_1/amd$ )     |    |                     |     |    |                     |
| Y1                           | Ge | 3.03(2) – 3.258(7)  | Y2  | Ge | 3.08(2) – 3.36(2)   |
|                              | Rh | 3.15(2) – 3.17(2)   |     | Rh | 3.14(2) – 3.19(2)   |
|                              | Y1 | 4.4775(1)           |     | Y2 | 4.45(2) – 4.48(2)   |
| Y3                           | Ge | 3.00(2) – 3.38(2)   | Rh1 | Ge | 2.46(1) – 2.495(9)  |
|                              | Rh | 3.16(2) – 3.17(2)   | Rh2 | Ge | 2.469(4) – 2.51(1)  |
|                              | Y3 | 4.45(2) – 4.48(2)   | Rh3 | Ge | 2.46(1) – 2.52(1)   |
| Ge                           | Ge | 2.52(2) – 3.44(2)   |     |    |                     |
